# Supplementary material for: Mild respiratory SARS-CoV-2 infection can cause multi-lineage cellular dysregulation and myelin loss in the brain
Source: PubMed Central journal article supplement (PMC8764721; doi:10.1101/2022.01.07.475453), 2022-01-10
Supplement: NIHPP2022.01.07.475453V1-supplement-1.pdf [file NIHPP2022.01.07.475453V1-supplement-1.pdf]

Supplementary Figure 1. Neuroinvasive SARS-CoV-2 mouse model as a positive control

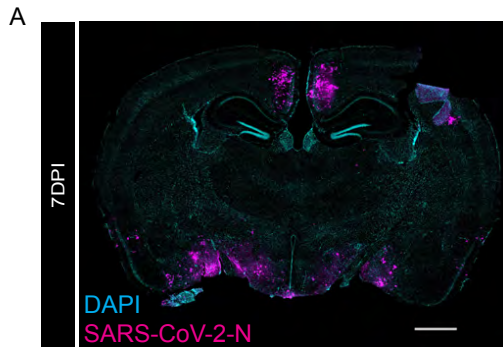

**Supplementary Figure 1. Neuroinvasive SARS-CoV-2 mouse model as a positive control for nucleocapsid protein immunostaining**

(A) Confocal micrograph of coronal section of mouse brain, illustrating SARS-CoV-2 nucleocapsid protein (SARS-CoV-2-N) 7-days post-infection (SARS-CoV-2-N, magenta; DAPI, cyan). Scale bar 1mm.

Related to Figure 1.

Supplementary Figure 2. Evidence of SARS-CoV-2 infection in lung

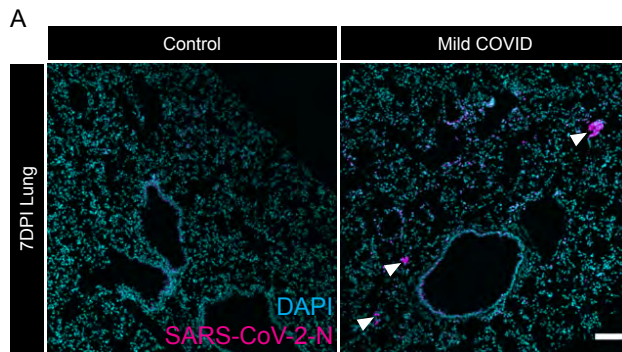

**Supplementary Figure 2. Evidence of SARS-CoV-2 infection in lung of mild respiratory COVID mouse model**

(A) Representative confocal micrographs of SARS-CoV-2 nucleocapsid protein (SARS-CoV-2-N, magenta; DAPI, cyan) in mouse lung 7-days post-infection. Arrowheads highlight SARS-CoV-2-N nucleocapsid protein immunostaining. Scale bar 100 $\mu$ m.

Related to Figure 1.

Supplementary Figure 3. White matter-selective microglial reactivity in humans with SARS-CoV-2 infection

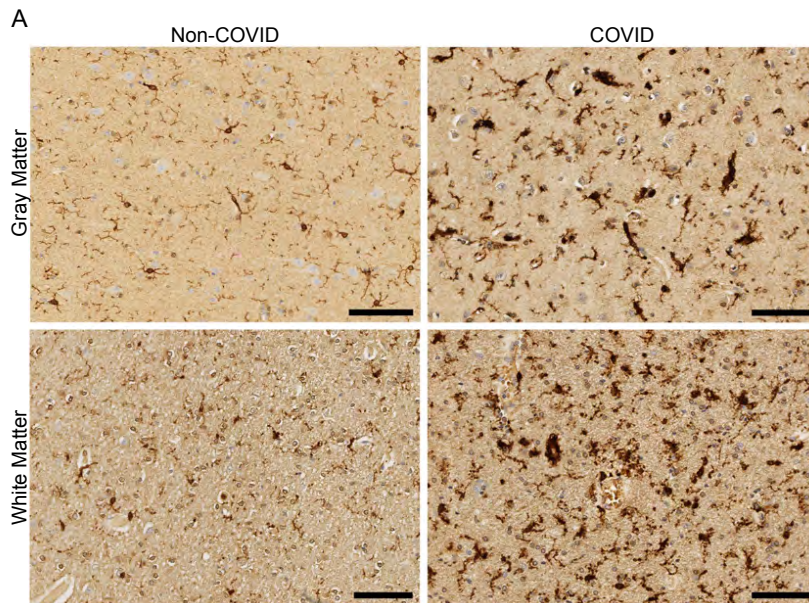

**Supplementary Figure 3. White matter-selective microglial reactivity in humans with SARS-CoV-2 infection**

(A) Representative micrographs of IBA1 immunostaining (brown) in the cerebral cortex (gray matter) or subcortical white matter of human subjects with or without COVID. Scale bars 100 $\mu$ m. Related to Figure 3.

Supplementary Figure 4. CCL11 levels after mild respiratory SARS-CoV-2 infection

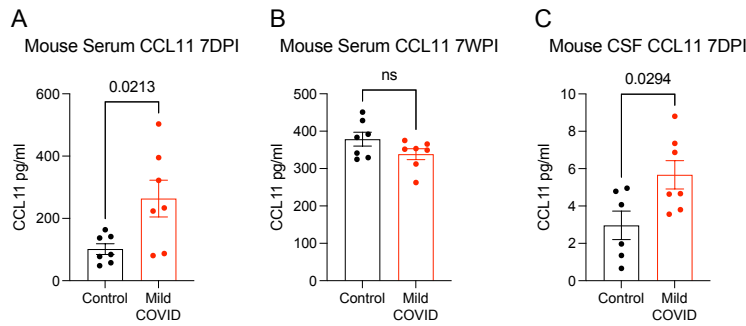

**Supplementary Figure 4. CCL11 levels after mild respiratory SARS-CoV-2 infection**

(A and B) Serum levels of CCL11 from CD1 mice 7-days post-infection (A) and 7-weeks post-infection (B). n=7 mice per group.

(C) CCL11 levels in CSF of CD1 mice 7-days post-infection. n=7 mice per group.

Data shown as mean +/- SEM; each dot represents an individual mouse; P values shown on figure panels; ns p>0.05; two-tailed unpaired t-test.

Data shown in heatmap form in Figure 1. Related to Figures 1 and 4.

Supplementary Figure 5. Validation of oligodendrocyte loss after SARS-CoV-2 infection

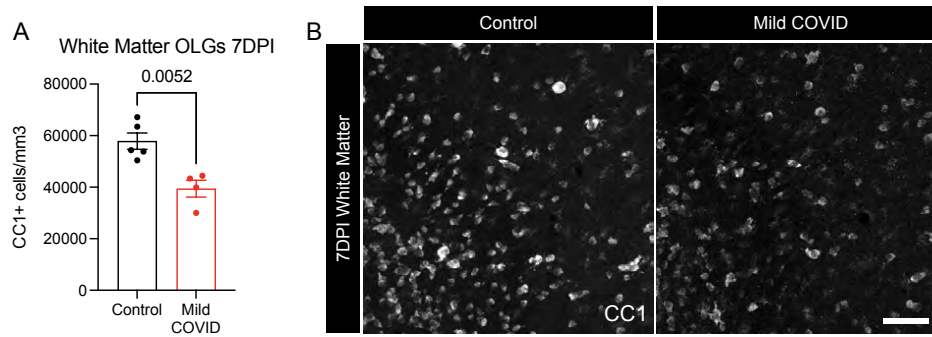

**Supplementary Figure 5. Validation of oligodendrocyte loss after mild respiratory SARS-CoV-2 infection**

(A) Oligodendrocyte (CC1+) quantification in the cingulum of the corpus callosum of CD1 mice 7-days post-infection.

(B) Representative confocal micrographs of oligodendrocytes (CC1, white) in the cingulum of the corpus callosum of CD1 mice 7-days post-infection. Scale bar 50µm.

Data shown as mean +/- SEM; each dot represents an individual mouse; unpaired, two-tailed t-test. P value shown on figure panel.

Related to Figure 5.

Supplementary Figure 6. Myelin ultrastructure after respiratory SARS-CoV-2 infection

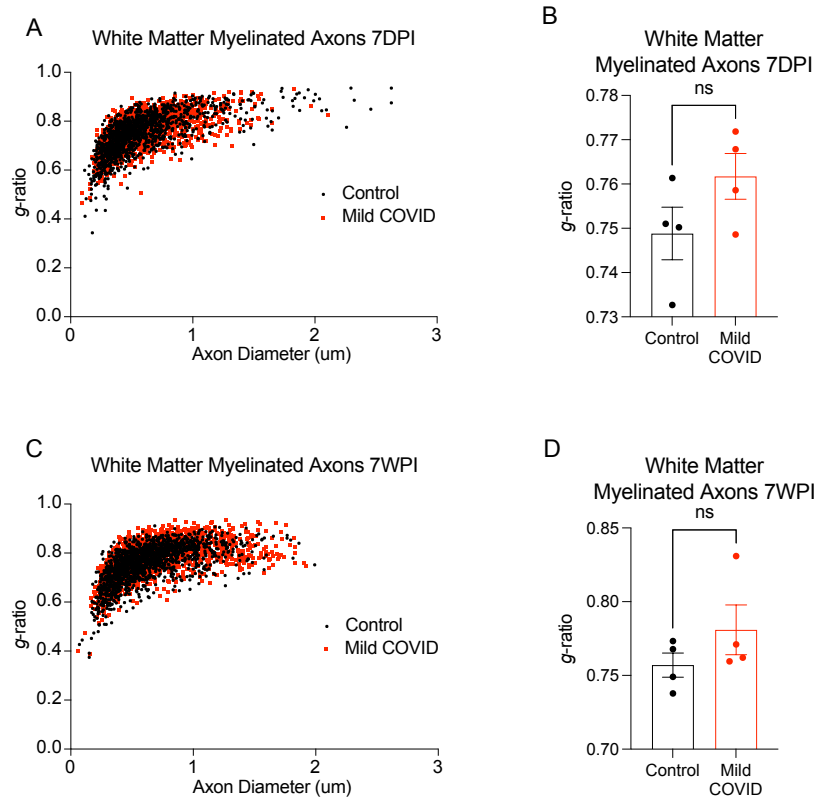

### Supplementary Figure 6. Myelin sheath thickness after mild respiratory SARS-CoV-2 infection

(A) Scatter plots of  $g$ -ratio relative to axon diameter 7-days-post infection. Black dots, control axons; red dots, axons from mice with mild respiratory COVID.

(B) Cumulative  $g$ -ratios of myelinated axons per animal at 7-days-post infection. Each dot represents an individual mouse.

(C) Scatter plots of  $g$ -ratio relative to axon diameter 7-weeks-post infection. Black dots, control axons; red dots, axons from mice with mild respiratory COVID.

(D) Cumulative  $g$ -ratios of myelinated axons per animal at 7-weeks-post infection. Each dot represents an individual mouse.

Data in B and D shown as mean  $\pm$  SEM;  $n=4$  mice per group; ns  $p>0.05$  by two-tailed, unpaired t-test.

Related to Figure 5.

**Supplementary Table 1. COVID-19 subject and non-COVID-19 control subject characteristics**

| Case           | Age/Sex | Past Medical Hx                                                                                                                                   | Recent Hx                                                                                                             | Days from symptom onset to death | Autopsy findings                                                                                                                                                                                                                                                                                                                    | Post-mortem Interval (hours) |
|----------------|---------|---------------------------------------------------------------------------------------------------------------------------------------------------|-----------------------------------------------------------------------------------------------------------------------|----------------------------------|-------------------------------------------------------------------------------------------------------------------------------------------------------------------------------------------------------------------------------------------------------------------------------------------------------------------------------------|------------------------------|
| COVID Case 1   | 73/M    | HTN, obesity                                                                                                                                      | Pneumonia, renal failure, pericardial effusion, arrythmia, hospitalized for 8 days intubated for 3 days               | 16 days                          | <u>Gross Autopsy Findings:</u> Severe pulmonary congestion with multifocal hemorrhages, pleural effusion, renal cortical pallor, fibrosis and calcification on epicardial surface<br><u>Brain Autopsy Findings:</u> Perivascular infiltrates, Eosinophilic degenerating neurons, Perivascular pallor in the cerebellar white matter | 38                           |
| COVID Case 2   | 39/M    | Methamphetamine use disorder, cardiac and kidney disease                                                                                          | Cardiac, renal and respiratory failure, Pulmonary emboli, hospitalized for 3 days                                     | 2 days                           | <u>Gross Autopsy Findings:</u> Cardiac hypertrophy, pulmonary and renal infarcts<br><u>Brain Autopsy Findings:</u> Perivascular infiltrates                                                                                                                                                                                         | 36                           |
| COVID Case 3   | 50/M    | DM, sciatica, back pain                                                                                                                           | Cough 3-5 days, found dead at home, PM swab +                                                                         | days                             | <u>Gross Autopsy Findings:</u> Acute DAD, HASCVD, fatty liver, nephrosclerosis<br><u>Brain Autopsy Findings:</u> Scattered acutely ischemic neurons                                                                                                                                                                                 | 33                           |
| COVID Case 4   | 39/M    | Drug use disorder                                                                                                                                 | Unknown, found dead in subway, PM swab +                                                                              | hours to days (presumed)         | <u>Gross Autopsy Findings:</u> Acute lung injury, toxicology + fentanyl, heroin, alcohol, fatty liver, LVH<br><u>Brain Autopsy Findings:</u> Acute neuronal ischemia, focal gliosis of hippocampus                                                                                                                                  | 34                           |
| COVID Case 5   | 58/F    | DM, Obesity, asthma, schizophrenia, had hospitalization with intubation for 1 month, discharged 1 month earlier                                   | Unknown, found dead at home, PM swab +                                                                                | days to weeks (presumed)         | <u>Gross Autopsy Findings:</u> Acute lung injury, fatty liver, diabetic kidney disease<br><u>Brain Autopsy Findings:</u> Microglial prominence and focal encephalitis (neuronophagia) of insula, basal nuclei, pons, medulla; Incidental capillary telangiectasia in pons and basal ganglia                                         | 29                           |
| COVID Case 6   | 58/F    | Obesity                                                                                                                                           | GI symptoms few days, found dead at home, PM swab +                                                                   | days                             | <u>Gross Autopsy Findings:</u> Acute DAD and fibrin thrombi, LVH, nephrosclerosis<br><u>Brain Autopsy Findings:</u> Focal mineralization of thalamic neurons                                                                                                                                                                        | 30                           |
| COVID Case 7   | 24/M    | Flu-like symptoms 3 weeks prior                                                                                                                   | Sudden death, PM swab +                                                                                               | 3 weeks                          | <u>Gross Autopsy Findings:</u> Acute lung injury<br><u>Brain Autopsy Findings:</u> Sparse perivascular parenchymal and leptomenigeal lymphocytes and microglial nodules in medulla                                                                                                                                                  | 13                           |
| COVID Case 8   | 55/M    | HTN, DM, HLD, obesity, depression                                                                                                                 | Flu-like symptoms for few days, agitated delirium, subdued by force, hospitalized 6 days, hospital swab and PM swab + | days to weeks                    | <u>Gross Autopsy Findings:</u> Acute DAD with fibrin thrombi, fatty liver disease and fibrosis, gun shot wounds to limbs<br><u>Brain Autopsy Findings:</u> Acute neuronal ischemia and microglial reaction, hippocampus, and temporal neocortex                                                                                     | 105                          |
| COVID Case 9   | 54/M    | Old TBI from assault 3 years prior, post-traumatic seizures, DM, in nursing home                                                                  | Recent flu-like symptoms, nursing home swab +                                                                         | Days                             | <u>Gross Autopsy Findings:</u> Aspiration pneumonia<br><u>Brain Autopsy Findings:</u> Subdural neomembranes, old contusions, slight perivascular lymphocytes in pons                                                                                                                                                                | 50                           |
| Control Case 1 | 54/M    | HTN, CAD with prior MI and coronary stent placement, smoking (1ppd for ~30 yrs, quit 5 years prior to death), colorectal tumor resection (benign) | N/A                                                                                                                   | N/A                              | <u>Brain Autopsy Findings:</u> No significant brain pathology                                                                                                                                                                                                                                                                       | 15                           |
| Control Case 2 | 54/M    | HTN, HLD, CAD with previous MI s/p pacemaker placement and CABG, CHF, atrial fibrillation Alcohol                                                 | N/A                                                                                                                   | N/A                              | <u>Brain Autopsy Findings:</u> Hypoxic-ischemic encephalopathy, cerebrovascular disease (arteriolosclerosis)                                                                                                                                                                                                                        | 48                           |

|                |      |                                                                                                                                                                                |     |     |                                                                                                                           |     |
|----------------|------|--------------------------------------------------------------------------------------------------------------------------------------------------------------------------------|-----|-----|---------------------------------------------------------------------------------------------------------------------------|-----|
|                |      | abuse, cirrhosis, end-stage kidney disease requiring dialysis, severe peripheral vascular disease complicated by lower limb gangrene requiring left lower extremity amputation |     |     |                                                                                                                           |     |
| Control Case 3 | 43/M | Bipolar disorder, schizophrenia, depression, PTSD, seasonal affective disorder, sickle cell trait, HLD, smoking (1ppd for ~25 years)                                           | N/A | N/A | <u>Brain Autopsy Findings:</u> No significant brain pathology                                                             | 28  |
| Control Case 4 | 70/M | Headaches, alcohol abuse, smoking (reported "5ppd since teens")                                                                                                                | N/A | N/A | <u>Brain Autopsy Findings:</u> Cerebrovascular disease (arteriosclerosis), age-related tauopathy                          | N/A |
| Control Case 5 | 65/M | HTN, asthma, insulin-dependent diabetes, cocaine use, 1/2ppd smoker, unexplained mental decline and gait instability                                                           | N/A | N/A | <u>Brain Autopsy Findings:</u> Cerebrovascular disease (atherosclerosis, arteriosclerosis), Lewy body disease/Parkinson's | 38  |

Legend: N/A, not available/applicable. Abbreviations: PMI, postmortem interval; CMV, cytomegalovirus; COPD, chronic obstructive pulmonary disease; DAD, diffuse alveolar damage, HTN, hypertension; CAD, coronary artery disease; MI, myocardial infarction; HLD, hyperlipidemia; CABG, coronary artery bypass grafting; CHF, congestive heart failure; PTSD, post-traumatic stress disorder.

Related to Figure 3.
